# Supplementary material
Source: PubMed Central journal article supplement (PMC6094392)
Supplement: mmc1.pdf [file mmc1.pdf]

## **Supplemental Information**

### **Optimized Cholesterol-siRNA Chemistry Improves Productive Loading onto Extracellular Vesicles**

**Reka Agnes Haraszti, Rachael Miller, Marie-Cecile Didiot, Annabelle Biscans, Julia F. Alterman, Matthew R. Hassler, Loic Roux, Dimas Echeverria, Ellen Sapp, Marian DiFiglia, Neil Aronin, and Anastasia Khvorova**

**Optimized cholesterol-siRNA chemistry improves productive loading onto extracellular vesicles**

Reka Agnes Haraszti<sup>1,2</sup>, Rachael Miller<sup>1,3</sup>, Marie-Cecile Didiot<sup>1,2</sup>, Annabelle Biscans<sup>1,2</sup>, Julia F Alterman<sup>1,2</sup>, Matthew R Hassler<sup>1,2</sup>, Loic Roux<sup>1,2</sup>, Dimas Echeverria<sup>1,2</sup>, Ellen Sapp<sup>4</sup>, Marian DiFiglia<sup>4</sup>, Neil Aronin<sup>1,3\*</sup>, Anastasia Khvorova<sup>1,2\*</sup>

<sup>1</sup>RNA Therapeutics Institute, University of Massachusetts Medical School, Worcester, MA, USA

<sup>2</sup>Program in Molecular Medicine, University of Massachusetts Medical School, Worcester, MA, USA

<sup>3</sup>Department of Medicine, University of Massachusetts Medical School, Worcester, MA, USA

<sup>4</sup>Mass General Institute for Neurodegenerative Disease, Boston, MA, USA

Correspondence should be addressed to:

Anastasia Khvorova ([anastasia.khvorova@umassmed.edu](mailto:anastasia.khvorova@umassmed.edu); 774-455-3638 / 508-856-6696 (fax)) and Neil Aronin ([neil.aronin@umassmed.edu](mailto:neil.aronin@umassmed.edu); 508-856-6559 / 508-856-6696 (fax)), University of Massachusetts Medical School, 368 Plantation Street, Worcester, MA, 01605

Keywords: Extracellular vesicles; siRNA; oligonucleotides; nanovesicles; chemical modification; RNA therapy

## Supplementary Information

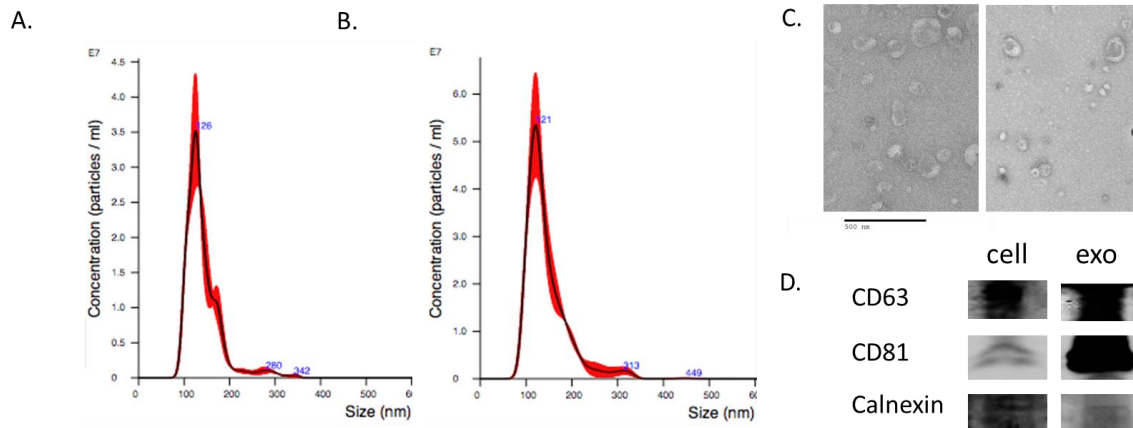

### Supplementary Figure 1. Characterization of liposomes and umbilical cord,

#### Wharton's jelly derived extracellular vesicles

**A.** Nanoparticle Tracking Analysis shows homogenous extracellular vesicle size distribution with mean diameter  $141 \pm 40$  nm,  $n=3$  **B.** Nanoparticle Tracking Analysis of neutral liposomes, mean diameter  $144 \pm 47$  nm,  $n=3$  **C.** Transmission Electron Microscopy image of unloaded (left) and loaded (right) extracellular vesicles, size bar shows 500 nm. **D.** Western blot of positive and negative extracellular vesicle marker proteins.

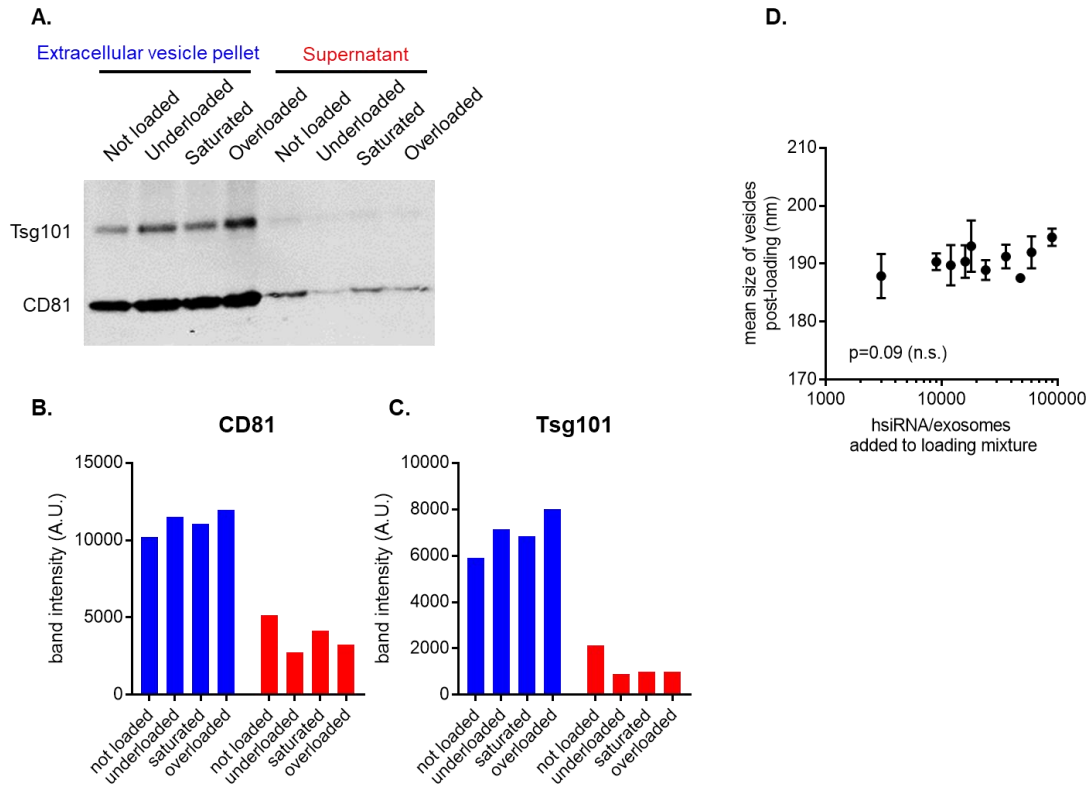

**Supplementary Figure 2. Characterization of loaded extracellular vesicles** **A.** Western blot of unloaded, underloaded, saturated and overloaded extracellular vesicles (0, 3000, 12 000 and 90 000 RNA molecules per vesicle mixed in; 0, 1900, 3700 and 14300 RNA molecules per vesicle loaded). After incubation at 37°C for 1 hour, extracellular vesicle-hsiRNA mixture was centrifuged at 100,000 g for 1 hour to pellet loaded extracellular vesicles (blue) and remove non-loaded siRNA (red). SDS-PAGE was conducted after lysis in RIPA. **B.** CD81 signal was quantified using ImageJ Gel Analysis tool. **C.** Tsg101 signal was quantified using ImageJ Gel Analysis tool. **D.** Size (average diameter of particles in nm) of loaded extracellular vesicles measured *via* Nanoparticle Tracking Analysis. n=3, mean ± SD

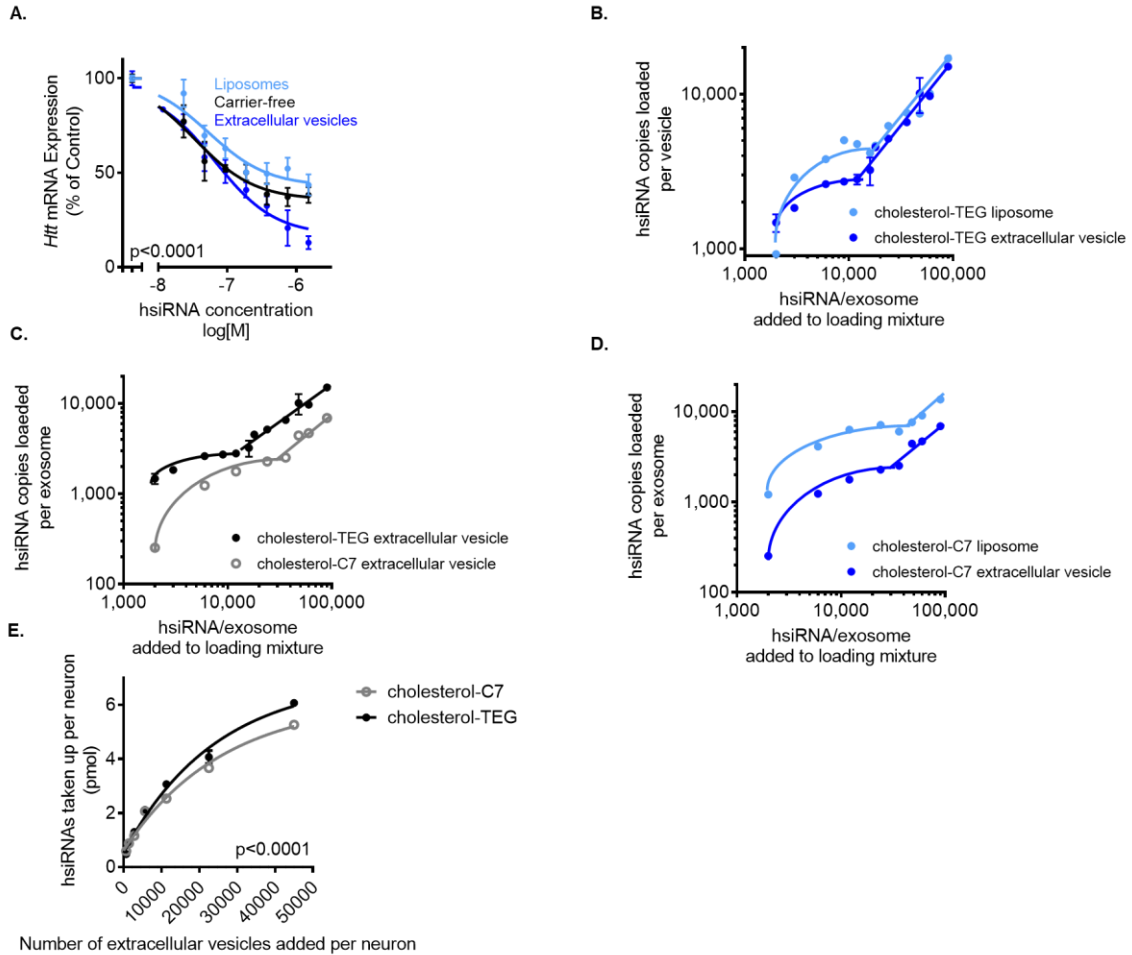

**Supplementary Figure 3. Comparison of loaded extracellular vesicles *versus* loaded liposomes** **A.** Silencing activity of hsiRNA loaded onto either extracellular vesicles (dark blue) or liposomes (light blue) or delivered carrier-free (black) to primary neurons.  $n=3$ , mean  $\pm$  SEM **B-D.** Cholesterol-hsiRNA was loaded onto extracellular vesicles at different hsiRNA-to-extracellular vesicles ratios. The loading curve shows an initial saturation phase followed by a secondary linear phase. **E.** Guide strand accumulation of cholesterol-C7-hsiRNA and cholesterol-TEG-hsiRNA in neurons following delivery *via* extracellular vesicles.  $n=3$ , mean  $\pm$  SEM, two-way ANOVA. Guide strand accumulation measured by PNA hybridization assay.

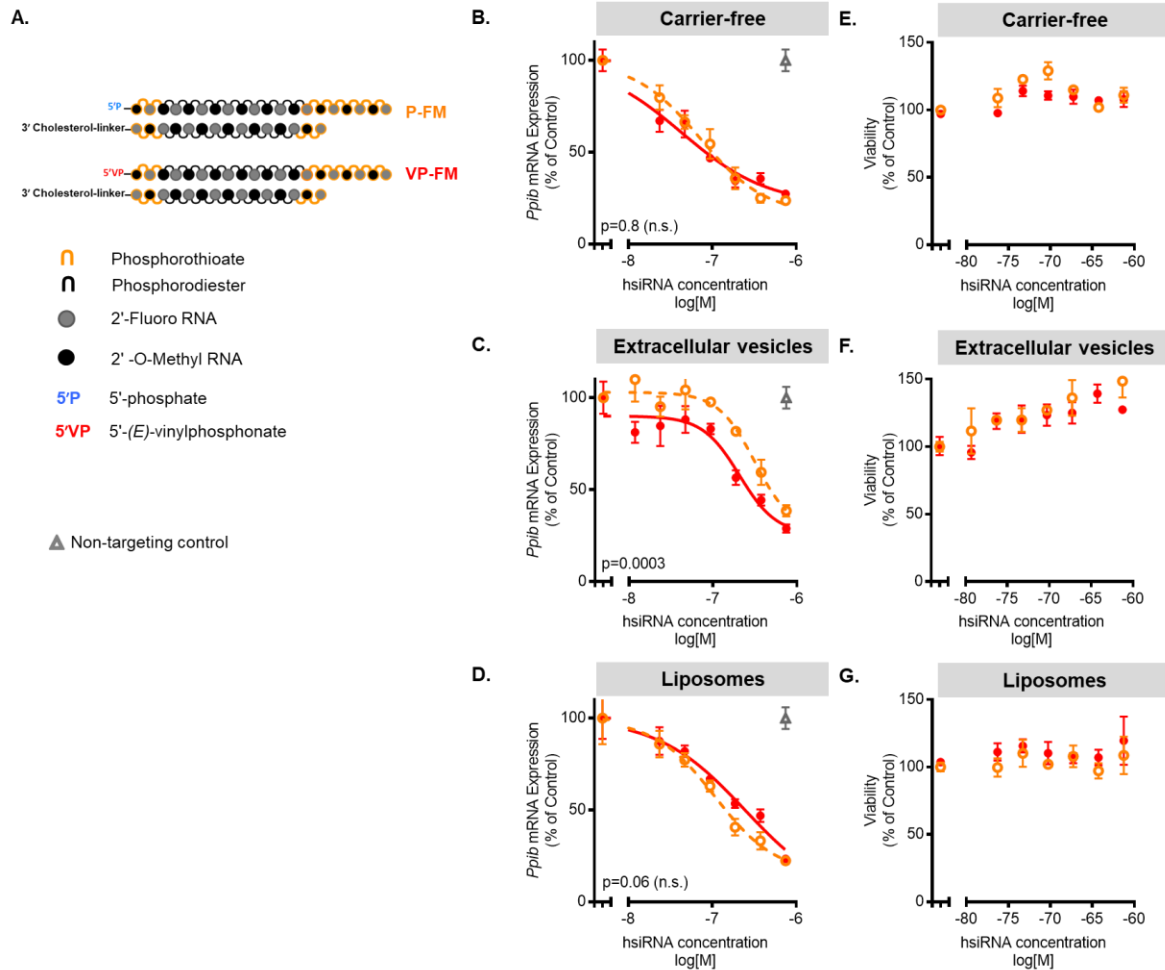

**Supplementary Figure 4. Stabilization of 5'-phosphate is not toxic in and beneficial for EV-mediated delivery of siRNAs.** **A.** Scheme of chemically modified hsiRNAs. P-FM fully modified backbone with 5'-phosphate on guide strand, VP-FM fully modified backbone with 5'-(E)-vinylphosphonate on guide strand.  $n=3$ , mean  $\pm$  SEM **B-D.** HeLa cells were incubated for three days with cholesterol-hsiRNA variants with different 5' end modifications either alone (carrier-free), or loaded onto extracellular vesicles or liposomes, target *Ppib* mRNA silencing was measured, and silencing potency calculated (IC<sub>50</sub>).  $n=3$  Pairwise comparison of curves was conducted using two-way ANOVA. Significance is depicted in grey. **E-G.** Primary murine cortical neurons were incubated for one week with cholesterol-hsiRNA variants with different 5' end modifications either alone (carrier-free),

or loaded onto extracellular vesicles or liposomes, targeting *Huntingtin*. To measure cell viability, Alamar Blue® was added and incubated at 37°C for 12 hours, and fluorescence measured at 570 nm excitation, 585 nm emission. Signal is normalized to non-treated cells samples. n=3, mean  $\pm$  SD

| Gene Targeted     | Compound Name                                 | Figure applicable | Strand    | Sequence 5'-3'                                                | Conjugate 5' | Conjugate 3'    |
|-------------------|-----------------------------------------------|-------------------|-----------|---------------------------------------------------------------|--------------|-----------------|
| <i>Huntingtin</i> | P-PM                                          | Fig.3.            | passenger | mC.mA.G.mU.A.A.A.G.A.G.A.mU.mU#mA#mA                          | Cy3          | Cholesterol-TEG |
|                   |                                               |                   | guide     | PmU.fU.A.A.fU.fC.fU.fC.fU.fU.fU.A.fC.fU#G#A#U#A#U#A           |              |                 |
| <i>Huntingtin</i> | VP-PM                                         | Fig.3.            | passenger | mC.mA.G.mU.A.A.A.G.A.G.A.mU.mU#mA#mA                          | Cy3          | Cholesterol-TEG |
|                   |                                               |                   | guide     | VPmU.fU.A.A.fU.fC.fU.fC.fU.fU.fU.A.fC.fU#G#A#U#A#U#A          |              |                 |
| <i>Huntingtin</i> | cholesterol-TEG<br>hsiRNA<br>P-FM             | Fig.1-3.          | passenger | fC#mA#fG.mU.fA.mA.fA.mG.fA.mG.fA.mU.fU#mA#fA                  | Cy3          | Cholesterol-TEG |
|                   |                                               |                   | guide     | PmU#fU#mA.fA.mU.fC.mU.fC.mU.fU.mU.fA.mC#fU#mG#fA#mU#fA#mU#fA  |              |                 |
| <i>Huntingtin</i> | VP-FM<br>Endonuclease stable                  | Fig.3-4.          | passenger | fC#mA#fG.mU.fA.mA.fA.mG.fA.mG.fA.mU.fU#mA#fA                  | Cy3          | Cholesterol-TEG |
|                   |                                               |                   | guide     | VPmU#fU#mA.fA.mU.fC.mU.fC.mU.fU.mU.fA.mC#fU#mG#fA#mU#fA#mU#fA |              |                 |
| <i>Huntingtin</i> | cholesterol-C7                                | Fig.1.            | passenger | fC#mA#fG.mU.fA.mA.fA.mG.fA.mG.fA.mU.fU#mA#fA                  | Cy3          | Cholesterol-C7  |
|                   |                                               |                   | guide     | PmU#fU#mA.fA.mU.fC.mU.fC.mU.fU.mU.fA.mC#fU#mG#fA#mU#fA#mU#fA  |              |                 |
| <i>Huntingtin</i> | moderately<br>endonuclease<br>sensitive (DNA) | Fig.4.            | passenger | fC#mA#fG.mU.A.mA.fA.mG.fA.mG.fA.mU.fU#mA#fA.dT.dT             |              | Cholesterol-TEG |
|                   |                                               |                   | guide     | VPmU#fU#mA.fA.mU.fC.mU.fC.mU.fU.mU.fA.mC#fU#mG#fA#mU#fA#mU#fA |              |                 |
| <i>Huntingtin</i> | highly endonuclease<br>sensitive (RNA)        | Fig.4.            | passenger | fC#mA#fG.mU.A.mA.fA.mG.fA.mG.fA.mU.fU#mA#fA.rU.rU             |              | Cholesterol-TEG |
|                   |                                               |                   | guide     | VPmU#fU#mA.fA.mU.fC.mU.fC.mU.fU.mU.fA.mC#fU#mG#fA#mU#fA#mU#fA |              |                 |
| <i>PPIB</i>       | P-FM                                          | Supp.Fig.4.       | passenger | fC#mA#fA.mA.fU.mU.fC.mC.fA.mU.fC.mG.fU#mG#fA                  | Cy3          | Cholesterol-TEG |
|                   |                                               |                   | guide     | PmU#fC#mA.fC.mG.fA.mU.fG.mG.fA.mA.fU.mU#fU#mG#fC#mU#fG#mU#fU  |              |                 |
| <i>PPIB</i>       | VP-FM                                         | Supp.Fig.4.       | passenger | fC#mA#fA.mA.fU.mU.fC.mC.fA.mU.fC.mG.fU#mG#fA                  | Cy3          | Cholesterol-TEG |
|                   |                                               |                   | guide     | vPmU#fC#mA.fC.mG.fA.mU.fG.mG.fA.mA.fU.mU#fU#mG#fC#mU#fG#mU#fU |              |                 |

**Supplementary Table 1. Table describing hsiRNA sequences used in this study.** m = 2' -O-methyl; f = 2' -fluoro; # = phosphorothioate; P = phosphate; VP = 5' -(E)-vinylphosphonate; TEG = triethyl glycol; C7 = 2-aminobutyl-1-3-propanediol



|        |       |                                                                                                           |         |
|--------|-------|-----------------------------------------------------------------------------------------------------------|---------|
| P49184 | DNSL1 | HUMAN Deoxyribonuclease-1-like 1 OS=Homo sapiens GN=DNASE1L1 PE=1 SV=1                                    | 34 kDa  |
| Q7KZF4 | SND1  | HUMAN Staphylococcal nuclease domain-containing protein 1 OS=Homo sapiens GN=SND1 PE=1 SV=1               | 102 kDa |
| O94919 | ENDD1 | HUMAN Endonuclease domain-containing 1 protein OS=Homo sapiens GN=ENDOD1 PE=1 SV=2                        | 55 kDa  |
| P13489 | RINI  | HUMAN Ribonuclease inhibitor OS=Homo sapiens GN=RNH1 PE=1 SV=2                                            | 50 kDa  |
| P21589 | SNTD  | HUMAN 5'-nucleotidase OS=Homo sapiens GN=NT5E PE=1 SV=1                                                   | 63 kDa  |
| P22413 | ENPP1 | HUMAN Ectonucleotide pyrophosphatase/phosphodiesterase family member 1 OS=Homo sapiens GN=ENPP1 PE=1 SV=2 | 105 kDa |
| P09543 | CN37  | HUMAN Isoform CNPI of 2',3'-cyclic-nucleotide 3'-phosphodiesterase OS=Homo sapiens GN=CNP                 | 45 kDa  |

**Supplementary Table 2. Nucleases detected in extracellular vesicles**
